# Supplementary material
Source: publisher figshare collection journal article supplement (https://gsapubs.figshare.com/ndownloader/files/38882892)
Supplement: Supplementary file 1 [file 38882892]

## Sheet: Feuil1
Table S2. Major element contents
Samples	Rock typea	SiO2 (wt%)	Al2O3 (wt%)	Fe2O3(T) (wt%)	MnO (wt%)	MgO (wt%)	CaO (wt%)	Na2O (wt%)	K2O (wt%)	TiO2 (wt%)	P2O5 (wt%)	LOIb (wt%)	Total	Mg#c
NA-19-06a	a	48.23	16.47	9.62	0.163	7.02	9.85	2.59	1.63	1.194	0.1	1.85	98.72	62.9567
NA-19-11a	a	49.14	14.57	8.2	0.143	12.1	10.75	1.97	0.9	0.292	< 0.01	1.91	99.98	77.4608
NA-19-11b	a	49.76	15.08	7.22	0.134	11.57	11.34	1.8	1.1	0.268	< 0.01	2.15	100.4	78.8683
NA-19-12a	a	50.14	15.31	7.14	0.119	11.08	11.39	2.71	0.15	0.337	< 0.01	2.26	100.6	78.3278
NA-19-12b	a	50.56	13.03	14.45	0.266	6.7	8.46	2.78	0.52	1.941	0.18	1	99.89	51.9205
NA-19-14b	a	48.53	17.99	9.85	0.168	6.36	9.15	2.48	2.19	1.248	0.12	2.09	100.2	60.0608
NA-19-21	a	50.68	16.21	9.43	0.154	5.1	8.36	4.62	0.63	1.193	0.1	1.96	98.45	55.7442
NA-19-24a	a	48.85	15.57	11.77	0.195	6.54	9.96	3.5	0.76	1.642	0.12	1.51	100.4	56.4102
NA-19-25b	a	49.67	17.09	10.27	0.208	6.02	10	2.88	1.54	1.272	0.13	1.46	100.5	57.7203
NA-19-36	b	48.38	15.97	8.73	0.149	8.06	12.26	3.08	0.52	0.936	0.17	1.51	99.77	68.2566
NA-19-37	b	49.45	16.01	8.8	0.108	7.81	13.34	3.01	0.26	0.778	0.02	1.18	100.8	67.3948
NA-19-38	c	45.95	19.64	5.09	0.092	8.51	13.65	0.8	2.19	0.167	< 0.01	3.96	100.1	79.5663
NA-19-39	c	46.03	13.65	7.34	0.131	13.15	15.4	1.01	0.69	0.25	< 0.01	2.81	100.5	80.6672
NA-19-40	b	43.94	13.42	15.53	0.183	9.71	10.66	2.36	0.55	1.889	0.16	1.89	100.3	59.2866
NA-19-41	b	46.95	15.1	10.83	0.186	8.58	11.62	2.81	0.41	0.989	0.08	1.75	99.3	64.8524
NA-19-42	b	48.69	14.71	10.5	0.162	8.94	10.45	3.22	0.56	1.136	0.08	2.3	100.7	66.4765
NA-19-43b	c	44.37	15.95	5.38	0.11	9.73	20.69	0.3	0.01	0.249	< 0.01	4.02	100.8	80.814
NA-19-53b	b	44.47	17.34	7.51	0.138	10.91	13.04	1.51	0.83	0.239	< 0.01	3	98.99	77.1868
NA-19-54	b	45.77	14.14	13.91	0.244	9.04	11.16	2.34	0.45	1.371	0.09	1.95	100.5	60.2165
NA-19-55	b	48.77	14.93	10.88	0.154	8.27	11.59	2.94	0.62	1.289	0.1	1.14	100.7	63.9029
NA-19-56	b	47.8	13.69	14.78	0.246	7.63	9.12	3.41	0.53	1.885	0.23	1.22	100.5	54.5934
NA-19-57	c	47.48	18.66	5.17	0.098	9.03	14.89	2.17	0.3	0.227	< 0.01	2.71	100.8	80.2679
NA-19-58	c	44.98	17.18	5.62	0.103	10.47	17.25	1.09	0.34	0.183	< 0.01	3.55	100.8	81.2696
NA-19-59b	c	46.4	17.74	5.76	0.11	9.39	14.57	1.06	1.64	0.269	< 0.01	3.54	100.5	79.1526
TM-19-07	b	50.19	15.72	9.19	0.177	8.53	10.19	3.32	0.85	0.736	0.1	1.5	100.5	68.3719
TM-19-08	b	47.91	14.52	11.44	0.197	9.52	10.56	2.93	0.46	1.253	0.06	1.82	100.7	65.9647
TM-19-09	b	46.19	14.91	11.28	0.186	9.6	12.11	2.49	0.22	1.016	0.05	1.99	100	66.467
TM-19-10b	c	47.35	23.83	4.5	0.066	6.46	10.38	2	2.66	0.11	< 0.01	3.15	100.5	76.9767
TM-19-11	c	45.99	17.22	7.31	0.133	10.84	12.98	1.7	0.98	0.61	0.04	2.12	99.93	77.5
TM-19-12	c	48.01	19.04	4.49	0.094	9.41	14.75	1.43	0.82	0.165	< 0.01	2.43	100.6	82.9963
TM-19-16	b	45.62	14.52	12.77	0.261	9.63	12.38	2.01	0.54	1.255	0.09	1.31	100.4	63.7199
TM-19-17	b	46.59	13.43	14.2	0.243	8.96	11.52	2.23	0.4	1.859	0.1	1.12	100.7	59.5072
TM-19-18	c	46.58	21.75	3.59	0.072	6.68	16.11	1.73	0.26	0.105	< 0.01	3.34	100.2	81.2511
TM-19-19a	b	47.1	16.41	7	0.139	9.9	14.56	1.18	1.33	0.466	< 0.01	2.53	100.6	76.7111
TM-19-19b	b	47.29	15.45	7.07	0.126	10.37	14.64	1.41	1.02	0.482	< 0.01	2.92	100.8	77.3556
TM-19-19c	c	47.19	18.1	4.89	0.088	10.1	14.14	1.82	0.9	0.194	0.01	2.56	100	82.7896
15-JDF-18a	b	50.11	17.61	9.83	0.144	6.53	7.69	4.26	1.04	1.121	0.1	2.26	100.7	60.7403
15-JDF-18b	b	45.5	13.9	14.64	0.249	8.68	10.98	2.5	0.37	1.862	0.16	1.52	100.4	57.9984
15-JDF-18c	b	48.09	13.54	12.34	0.106	7.41	10.45	3.52	0.46	1.823	0.17	1.81	99.73	58.3079
15-JDF-18d	b	48.77	13.24	12.88	0.196	8.19	9.83	3.54	0.12	1.559	0.13	1.57	100	59.6928
15-JDF-19b	b	46.49	13.15	14	0.344	9.17	12.25	1.86	0.62	1.731	0.07	0.65	100.3	60.4
15-JDF-20a	c	47.46	16.68	5.44	0.109	8.77	15.81	1.93	0.31	0.211	< 0.01	3.81	100.5	78.968
15-JDF-20b	c	45.56	17.19	6.01	0.097	13.1	12.84	1.25	0.82	0.136	< 0.01	3.09	100.1	83.5433
15-JDF-20c	c	46.67	18.11	6.05	0.118	9.88	13.55	1.68	0.89	0.184	< 0.01	3.51	100.6	79.1814
15-JDF-20d	b	48.21	14.51	12.43	0.145	7.32	10.75	3.39	0.55	1.74	0.16	1.29	100.5	57.8335
15-JDF-24b	c	46.24	18.9	4.84	0.093	8.31	15.34	0.8	2.05	0.217	< 0.01	3.86	100.7	79.9951
15-JDF-26	b	47.1	13.13	10.01	0.181	11.37	13.92	1.68	0.42	0.679	< 0.01	2.18	100.7	72.5685
15-JDF-27a	c	47.97	17.76	5.41	0.1	9.74	11.79	1.62	2.45	0.223	< 0.01	3.42	100.5	80.7436
15-JDF-27b	b	47.17	15.9	9	0.134	7.95	12.04	2.72	0.65	1.083	0.12	2.49	99.26	67.2913
15-JDF-28a	c	45.9	21.94	4.81	0.075	8.1	9.75	2.26	1.9	0.071	< 0.01	5.43	100.2	79.6832
15-JDF-28b	c	47.56	20.72	4.41	0.078	7.36	12.61	2.37	1.46	0.165	0.01	3.82	100.6	79.5374
15-JDF-28c	c	45.6	20.78	5.22	0.091	8.18	10.9	1.56	2.26	0.201	< 0.01	4.49	99.29	78.4931
15-JDF-30a	c	46.61	21.5	4.52	0.088	7.83	12.34	1.84	1.86	0.197	< 0.01	3.71	100.5	80.1372
15-JDF-30b	c	47.64	20.85	4.59	0.085	7.14	14.46	2.07	0.31	0.169	< 0.01	2.46	99.76	78.3686
15-JDF-32a	b	47.34	16.43	8.94	0.133	7.61	12.01	2.43	0.82	0.752	0.05	2.2	98.73	66.4713
15-JDF-32b	b	46.89	13.78	13.88	0.222	7.56	9.36	3.16	0.44	1.855	0.16	2.12	99.42	55.9187
15-JDF-36	b	45.37	13.92	13.05	0.21	8.62	12.23	2.21	0.49	1.569	0.12	2.33	100.1	60.605
15-JDF-39	b	47.13	12.19	8.69	0.164	10.18	18.01	0.56	0.03	0.569	0.03	2.5	100.1	73.1784
15-JDF-40	a	47.55	13.85	12.43	0.163	8.07	11.61	3.1	0.29	1.679	0.16	1.4	100.3	60.1923
15-JDF-66	a	48.17	13.78	13.11	0.212	8.75	8.88	3.09	0.56	1.657	0.19	1.54	99.94	60.8526
14-CG-06d	c	49.91	15.16	4.85	0.107	10.23	14.01	1.51	1.57	0.251	0.03	2.92	100.6	83.0868
14-CG-06e	c	47.78	18.83	4.42	0.088	8.49	13.71	1.43	1.82	0.162	-	3.61	100.4	81.7305
14-CG-06f	b	47.34	13.64	9.35	0.192	11.54	12.94	1.78	0.33	0.491	-	1.99	99.6	74.1904
9495	c	46.81	18.3	6.34	0.112	9.04	14.18	2.18	0.44	0.35	< 0.01	2.58	100.3	76.8564
a - Rock type: a = Common amphibolite; b = Grt-Cpx amphibolite; c = Cpx-Grt granulite
b - Loss on ignition
c - Mg# = Mg2+/(Fe2+ +Mg2+), Fe3+/FeTotal = 0.15
